# Supplementary material for: AhpC of the mycobacterial antioxidant defense system and its interaction with its reducing partner Thioredoxin-C
Source: PubMed Central journal article supplement (PMC5505994; doi:10.1038/s41598-017-05354-5), 2017-07-11
Supplement: 41598_2017_5354_MOESM1_ESM.pdf [file 41598_2017_5354_MOESM1_ESM.pdf]

**AhpC of the mycobacterial antioxidant defense system and its interaction with its  
reducing partner Thioredoxin-C**

Chui Fann Wong<sup>1</sup>, Joon Shin<sup>1</sup>, Malathy Sony Subramanian Manimekalai<sup>1</sup>, Wuan Geok Saw<sup>1</sup>,  
Zhan Yin<sup>1,2</sup>, Shashi Bhushan<sup>1,2</sup>, Arvind Kumar<sup>1</sup>, Priya Rangunathan<sup>1</sup>, and Gerhard Grüber<sup>1,\*</sup>

<sup>1</sup> Nanyang Technological University, School of Biological Sciences, 60 Nanyang Drive,  
Singapore 637551, Republic of Singapore

<sup>2</sup> NTU Institute of Structural Biology, Nanyang Technological University, Republic of  
Singapore

\* To whom correspondence should be addressed: Prof. Dr. Gerhard Grüber, Tel.: + 65 - 6316  
2989; Fax: + 65 - 6791 3856, E-mail: [ggrueber@ntu.edu.sg](mailto:ggrueber@ntu.edu.sg)

**Keywords:** *Mycobacteria*, Tuberculosis, Redox homeostasis, Reactive oxygen species,  
Oxidative stress, Alkylhydroperoxide reductase

**Supplementary Figure 1.** DLS analysis of reduced *MbAhpC* (*red*) and the reduced mutant *MbAhpC*<sub>T5A</sub> (*green*) revealed a smaller oligomer in *MbAhpC*<sub>T5A</sub> as compared to wt *MbAhpC*. This further illustrates the importance in T5 in maintaining the dodecamer formation.

**Supplementary Figure 2.** Selected sections of the overlaid <sup>1</sup>H-<sup>15</sup>N-HSQC spectra of free *MbTrxC* (*red*), as well as *MbTrxC-MbAhpC*<sub>T5A/D8A</sub> (*blue*) and *MbTrxC-MbAhpC*<sub>D22N/K25Q/D27N</sub> (*green*) complexes at a molar ratio of 1 (*MbTrxC*) : 2 (*MbAhpC* mutants). The residues undergoing disappearance of resonance or chemical shift perturbation are marked as box and labelled.

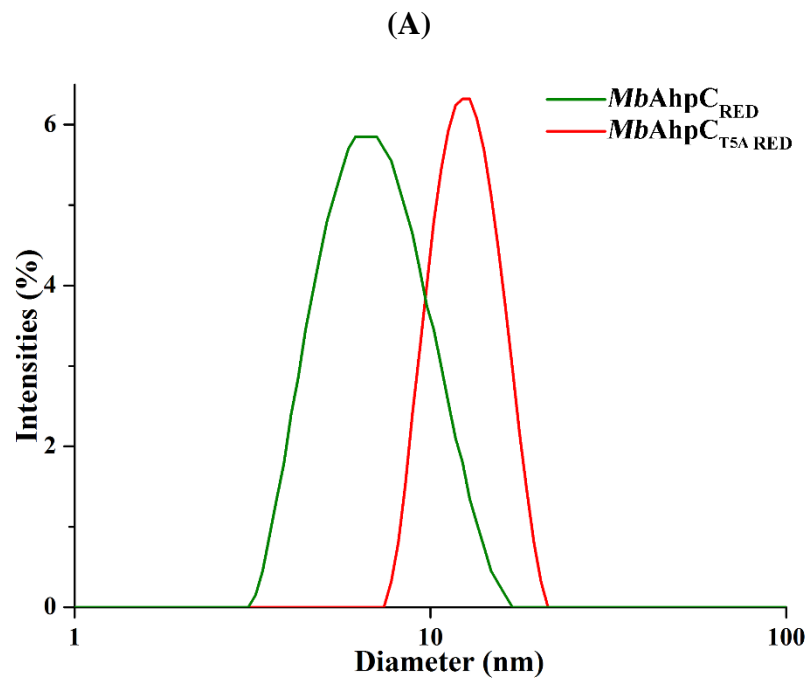

Supplementary Figure 1

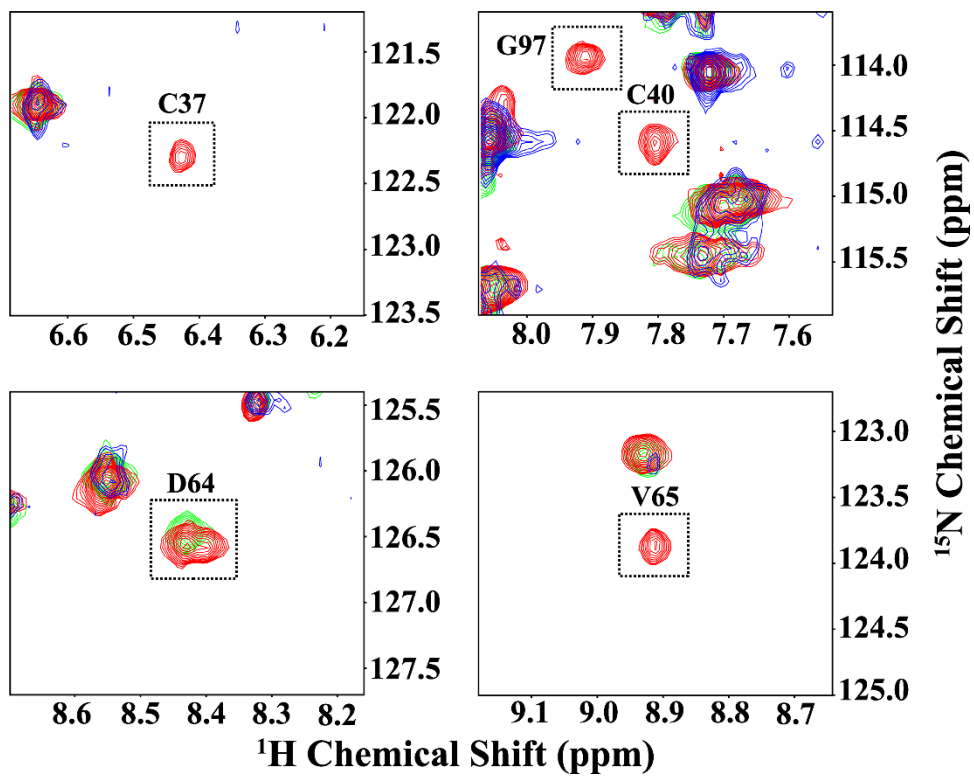

Supplementary Figure 2
